# Supplementary material for: Deletion of Mfsd2b impairs thrombotic functions of platelets
Source: PubMed Central journal article supplement (PMC8052357; doi:10.1038/s41467-021-22642-x), 2021-04-16
Supplement: 41467_2021_22642_MOESM3_ESM.pdf [file 41467_2021_22642_MOESM3_ESM.pdf]

## **Description of Additional Supplementary Files**

File Name: Supplementary Data 1

Description: Raw and processed data for sphingolipids and phospholipids analysis by mass spectrometry.
